# Supplementary material for: Safety and Preliminary Efficacy of Intravenous Allogeneic Adipose-Derived Mesenchymal Stem Cells (GXIPC1) in Patients with Type 1 Diabetes Mellitus: A Phase 1, Single-Arm, Open-Label Clinical Trial
Source: Research Square preprint supplement (doi:10.21203/rs.3.rs-8189178/v1), 2026-01-16
Supplement: Supplementary file 1 [file 1bcdc30621c54c0e0eaf1dab.docx]

**Supplementary Tabe 1. Longitudinal changes in HbA1C levels over 6 months**

| **PID** | **Baseline** | **1 month** | **3 months** | **6 months** |
| --- | --- | --- | --- | --- |
| 1 | 6.5 | 7.39 | 7.47 | 7.58 |
| 2 | 6.73 | 6.79 | 6.56 | 7.67 |
| 3 | 6.63 | 6.54 | 7.35 | 7.33 |
| 4 | 6.98 | 6.34 | 7.53 | 8.42 |
| 5 | 7.84 | 8.3 | 8.01 | 8.7 |
| 6 | 16.42 | 7.61 | 8.79 | 9.78 |
| 7 | 6.69 | 7.86 | 7.33 |  |
| 8 | 11.0 | 6.03 | 6.2 | 5.98 |
| 9 | 7.8 | 9.16 | 9.04 | 10.13 |
| 10 | 13.2 | 8.89 | 6.57 | 8.27 |
| **Median** | **7.39** | **7.5** | **7.41** | **8.27** |
| **Interpercentile range** | **[6.7-10.21]** | **[6.60-8.19]** | **[6.76-7.89]** | **[7.58-8.7]** |

*Values are presented for each participant at baseline, 1 month, 3 months, and 6 months. Data are reported as absolute values (%). Median (interquartile range) for each timepoint is shown in the last two rows.*

**Supplementary Tabe 2. Longitudinal changes in fasting blood glucose over 6 months**

| **PID** | **Baseline** | **1 month** | **3 months** | **6 months** |
| --- | --- | --- | --- | --- |
| 1 | 27.8 | 5 | 11.2 | 10.9 |
| 2 | 8.47 | 6 | 6 | 8.7 |
| 3 | 15.6 | 5 | 6.2 | 6.5 |
| 4 | 15 | 3.8 | 8.1 | 4.5 |
| 5 | 7.2 | 7.1 | 18.7 | 19.6 |
| 6 | 37.7 | 8.5 | 9.8 | 3.4 |
| 7 | 7.76 | 5.3 | 8.17 | - |
| 8 | 7.12 | 5.5 | 6.2 | 5.2 |
| 9 | 21.1 | 18 | 9.9 | 7.9 |
| 10 | 20.76 | 7.5 | 6.5 | 8.2 |
| **Median** | **15.3** | **5.8** | **8.1** | **7.9** |
| **Interpercentile range** | **[7.9-21.0]** | **[5.1-7.4]** | **[6.3-9.9]** | **[5.2-8.7]** |

*Values are presented for each participant at baseline, 1 month, 3 months, and 6 months. Data are reported as absolute values (mmol/L). Median (interquartile range) for each timepoint is shown in the last two rows.*

**Supplementary Tabe 3. Longitudinal changes in C-peptide over 6 months**

| **PID** | **Baseline** | **1 month** | **3 months** | **6 months** |
| --- | --- | --- | --- | --- |
| 1 | 0.3 | 0.18 | 0.16 | 0.16 |
| 2 | 1.06 | 0.88 | 1.06 | 0.86 |
| 3 | 1.69 | 1.03 | 1.12 | 0.02 |
| 4 | 0.16 | 0.04 | 0.13 | 0.94 |
| 5 | 0.04 | 0.04 | 0.09 | 0.05 |
| 6 | 0.3 | 0.52 | 0.44 |  |
| 7 | 0.38 | 0.12 | 0.176 |  |
| 8 | 0.56 | 0.19 | 0.34 | 0.16 |
| 9 | 0.32 | 0.13 | 0.07 | 0.03 |
| 10 | 0.43 | 0.78 | 0.88 | 0.44 |
| **Median** | **0.35** | **0.19** | **0.26** | **0.16** |
| **Interpercentile range** | **[0.3-0.53]** | **[0.12-0.72]** | **[0.14-0.77]** | **[0.05-0.55]** |

*Values are presented for each participant at baseline, 1 month, 3 months, and 6 months. Data are reported as absolute values (values ng/mL). Median (interquartile range) for each timepoint is shown in the last two rows.*

**Supplementary Tabe 4. Longitudinal changes in daily Insulin dose over 6 months**

| **PID** | **Baseline** | **1 month** | **3 months** | **6 months** |
| --- | --- | --- | --- | --- |
| 1 | 24 | 26 | 25 | 25 |
| 2 | 21 | 21 | 9 | 11 |
| 3 | 18 | 17 | 0 | 0 |
| 4 | 35 | 25 | 19 | 24 |
| 5 | 80 | 80 | 80 | 85 |
| 6 | 28 | 7 | 10 | 15 |
| 7 | 10 | 9 | 12 | - |
| 8 | 21 | 24 | 13 | 23 |
| 9 | 25 | 28 | 17 | 26 |
| 10 | 4 | 4 | 4 | 18 |
| **Median** | **22.5** | **22.5** | **12.5** | **23** |
| **Interpercentile range** | **[18.8-27.3]** | **[11-25.8]** | **[9.3-18.5]** | **[15-25]** |

*Values are presented for each participant at baseline, 1 month, 3 months, and 6 months. Data are reported as absolute values (IU/day). Median (interquartile range) for each timepoint is shown in the last two rows.*
