# Supplementary material for: Safety and Preliminary Efficacy of Intravenous Allogeneic Adipose-Derived Mesenchymal Stem Cells (GXIPC1) in Patients with Type 1 Diabetes Mellitus: A Phase 1, Single-Arm, Open-Label Clinical Trial
Source: Research Square preprint supplement (doi:10.21203/rs.3.rs-8189178/v1), 2026-01-16
Supplement: Supplementary file 2 [file 4f7bc897c6abfc20477357d5.docx]

**Supplement Figure 1. Morphology and characterization of GXIPC1.** (A) Representative micrographs showing the spindel shape morphology of GXIPC1. (B) Multipotent differentiation assays confirmed the ability of GXIPC1 to differentiate into adipogenic (Oil Red O staining), osteogenic (Alizarin Red staining), and chondrogenic (Alcian Blue staining) lineages. (C) Flow cytometry analysis demonstrated that GXIPC1 were positive for CD73, CD90, and CD105, but negative for CD14, CD19, CD34, CD45, and HLA-DR. FITC: fluorescein isothiocyanate; HLA-DR: human leukocyte antigen D receptor; PE: phycoerythrin.

**Supplement Figure 2. Longitudinal trends in pulse rate, blood pressure, and temperature over 6 months.** Pulse rate and body temperature are presented as mean (standard deviation) at baseline, 1 month, 3 months, and 6 months. Blood pressure measurements are shown as median (interpercentile range), including systolic and diastolic values for each timepoint. All parameters remained within clinically acceptable ranges throughout the study period.

**Supplement Figure 3. Changes in hematologic indices over 6 months.** Red blood cell count, white blood cell count, platelet count, and hemoglobin concentration are presented as mean (standard deviation) at baseline, 1 month, 3 months, and 6 months. All parameters remained within normal reference ranges and showed no clinically meaningful variation throughout the follow-up period.

**Supplement Figure 4. Longitudinal trends in liver and renal function markers.** Serum ALT, AST, urea, and creatinine levels are presented as mean (standard deviation) at baseline, 1 month, 3 months, and 6 months. All values remained within normal physiological ranges, and no clinically significant changes were observed throughout the follow-up period.

**Supplement Figure 5. Longitudinal changes in electrolyte levels.** Serum sodium, potassium, calcium, and phosphate concentrations are presented as mean (standard deviation) at baseline, 1 month, 3 months, and 6 months. All values remained within normal physiological limits and showed no clinically significant variation over the study period

**Supplement Figure 6. Longitudinal amylase and CRP levels over 6 months.** Amylase levels are depicted as mean (standard deviation) at each study timepoint. C-reactive protein (CRP) concentrations are represented as median (interpercentile range). Both parameters remained within their respective reference ranges throughout the follow-up period

**Supplement Figure 7. Longitudinal trends in glycemic and beta-cell parameters over 6 months.** Data are presented as Mean (SD) for HbA1C and as Median (interpercentile range) for fasting blood glucose, C-peptide, and daily insulin dose at baseline, 1 month, 3 months, and 6 months.
